# Supplementary material for: Rational design of multistimuli responsive organogels by alternation of hydrogen-bonding and amphiphilic properties
Source: Royal Society of Chemistry journal article supplement (doi:10.1039/c1ra00722j), 2011-12-05
Supplement: c1ra00722j.pdf [file c1ra00722j.pdf]

# Electronic Supplementary Information for

## Rational Design of Multistimuli Responsive Organogels by Alternation of Hydrogen-bonding and Amphiphilic Properties

Wendan Chen, Weitao Gong\*, Junwei Ye, Yuan Lin, Guiling Ning\*

*State Key Laboratory of Fine Chemicals, School of Chemical Engineering, Dalian University of Technology, Dalian, 116024, China*

### Experimental section

**Materials.** Methyl 3,4,5-trihydroxybenzoate were purchased from Alfa Aesar. All other reagents and solvents (standard grade) were used as received unless otherwise stated.

**Characterization Techniques.**  $^1\text{H-NMR}$  and  $^{13}\text{C-NMR}$  spectra were recorded with a Bruker AVANCE-400 spectrometer. MS spectra were measured on a Agilent 6310 MS spectrometer and a Q-TOF MS spectrometer. Absorption spectra were recorded in a U-4100 HITACHI spectrophotometer.

The SEM image was measured with a Hitachi S-4800 field emission scanning electron microscope operated at 5 kV and JEOL-5600LV, operated at 15 kV. The sample was prepared as follows: a few drops of organogel were deposited on a clean Si substrate, and after the evaporation of the solvent the sample was sputtered with gold.

**Syntheses.** The synthetic route to **G1** was shown in Figure S1. The intermediates compound **2**, **3** and **4** were synthesized according to literatures<sup>[1,2]</sup>.

**Synthesis of compound G1.** Compound **4** (157.0mg, 0.7mmol) and **3** (482.4mg, 0.7mmol) were mixed in ethanol (20mL) and the solution was stirred under reflux conditions for 72 hours. After cooling to room temperature, the yellow precipitate was filtrated, washed with ethanol three times, then recrystallized with ethanol to get yellow powdery product **G1** (536.8mg, 0.60mmol) in 85% yield.  $^1\text{H-}$

NMR (400 MHz,  $\text{CDCl}_3$ ):  $\delta = 11.54$  (1H, s), 9.20 (1H, s), 8.60 (1H, s), 7.97 (1H, m), 7.89 (1H, s), 7.87 (2H, s), 7.50 (3H, m), 7.04 (2H, s), 4.01 (6H, m), 1.78 (6H, m), 1.26 (54H, s), 0.88 (9H, m);  $^{13}\text{C}$ -NMR (100MHz,  $\text{CDCl}_3$ ):  $\delta = 153.27, 152.37, 154.70, 141.91, 130.64, 129.09, 126.95, 126.60, 126.35, 122.60, 118.10, 117.57, 106.03, 73.63, 69.42, 31.94, 30.37, 29.76, 29.73, 29.71, 29.68, 29.61, 29.45, 29.38, 26.10, 22.70, 14.11$ ; MALDI-TOF-MS  $m/z$  calc. for  $\text{C}_{56}\text{H}_{88}\text{N}_4\text{O}_5[\text{M}+\text{Na}^+]$ : 919.6652, found: 919.6685.

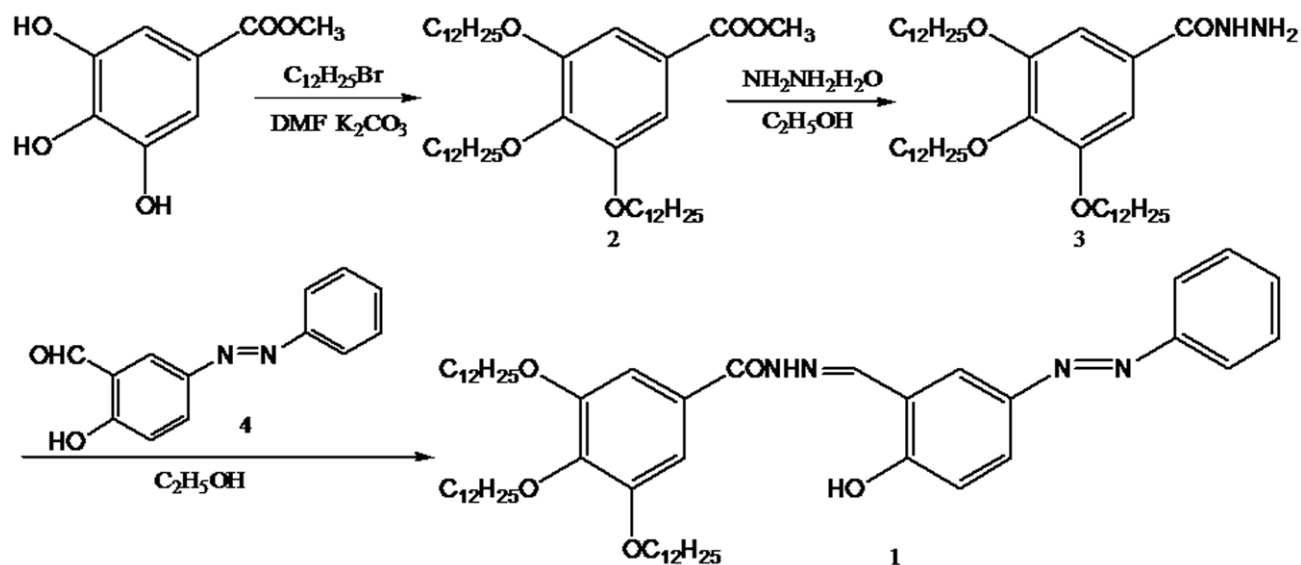

Figure S1. Synthetic route to G1.

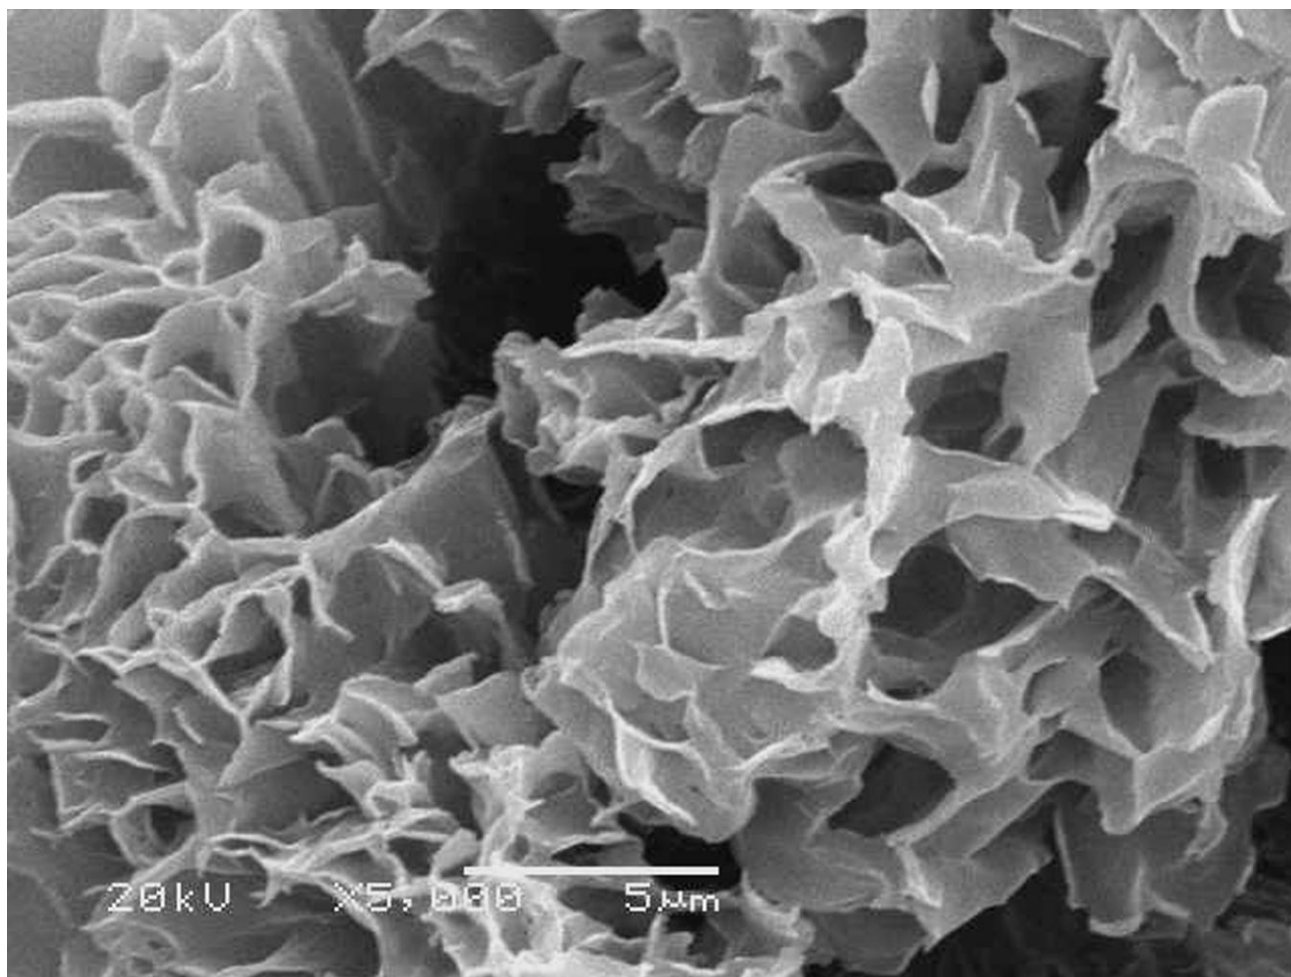

**Figure S2.** SEM image of the xerogel G1.

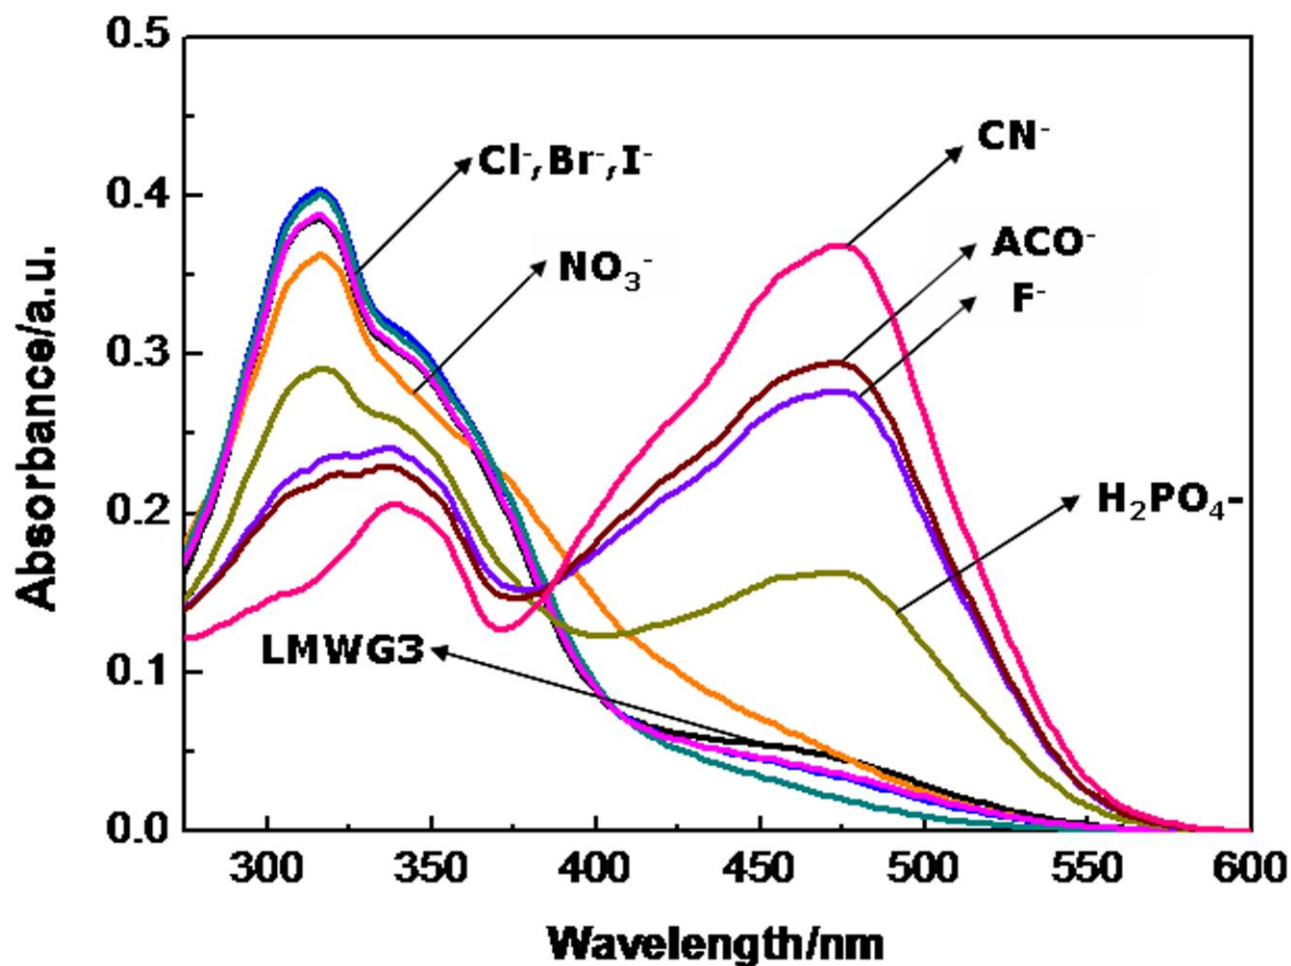

**Figure S3.** UV-Vis absorption spectra of G1 ( $1 \times 10^{-5}$  M) in the presence of 5 equiv of various anions in MeCN at room temperature.

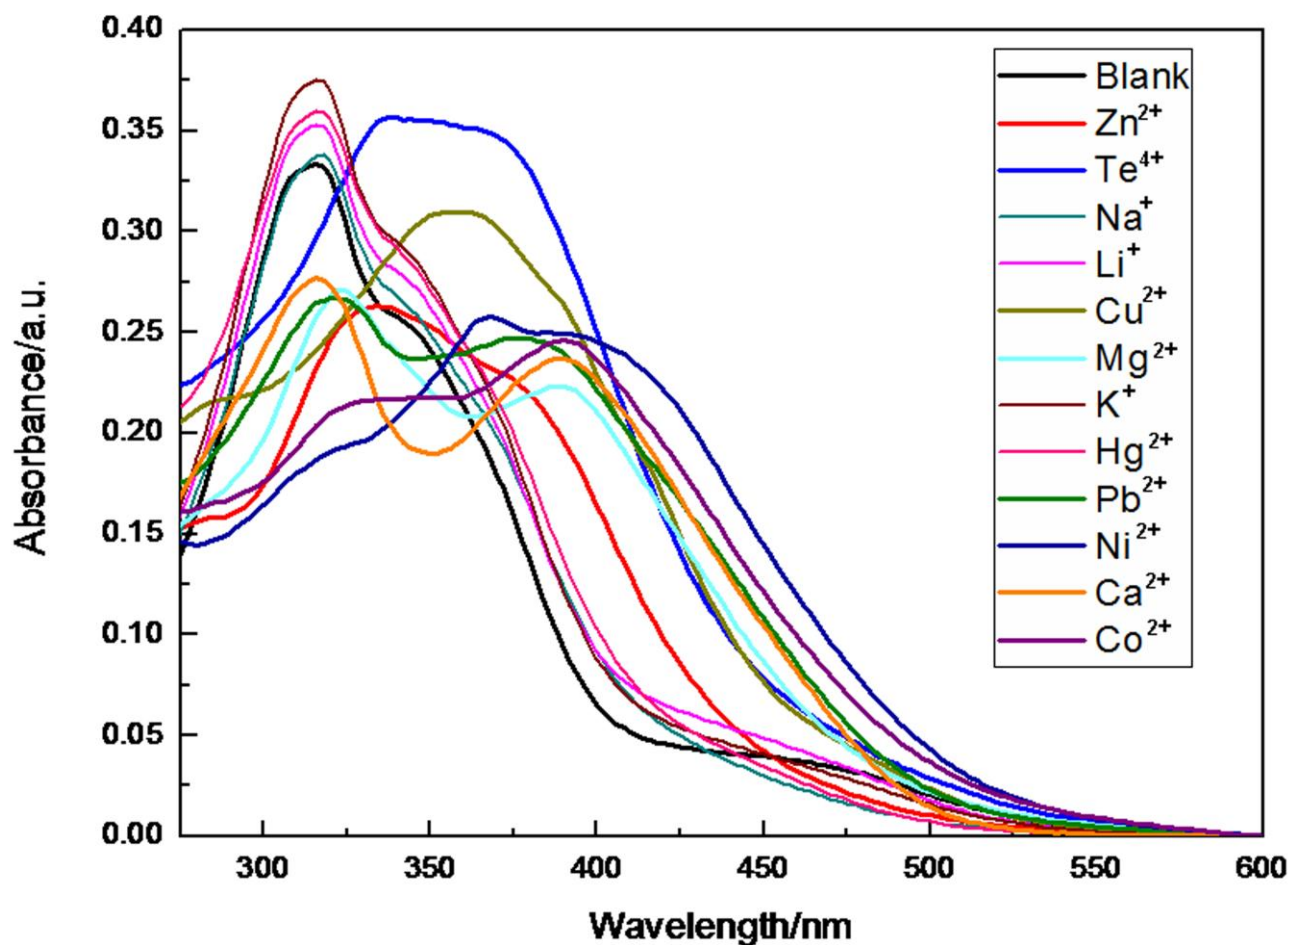

**Figure S4.** UV-Vis absorption spectra of **G1** ( $1 \times 10^{-5}$  M) in the presence of 5 equiv. of various metal ions in MeCN at room temperature.

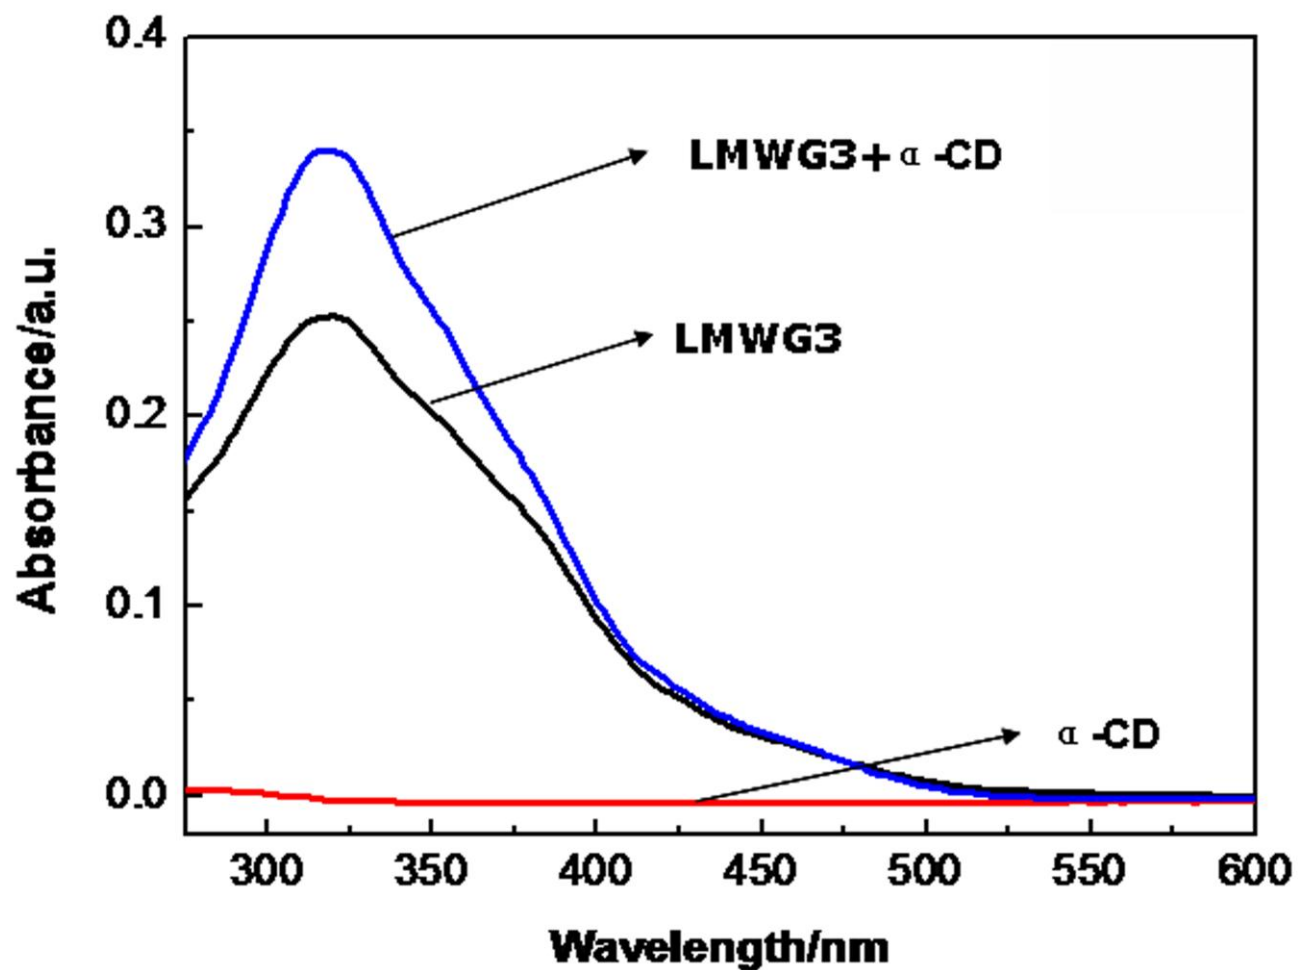

**Figure S5.** UV-Vis absorption of **G1** ( $1 \times 10^{-5}$ M) in the presence of 5 equiv. of  $\alpha$ -CD in DMSO at room temperature.

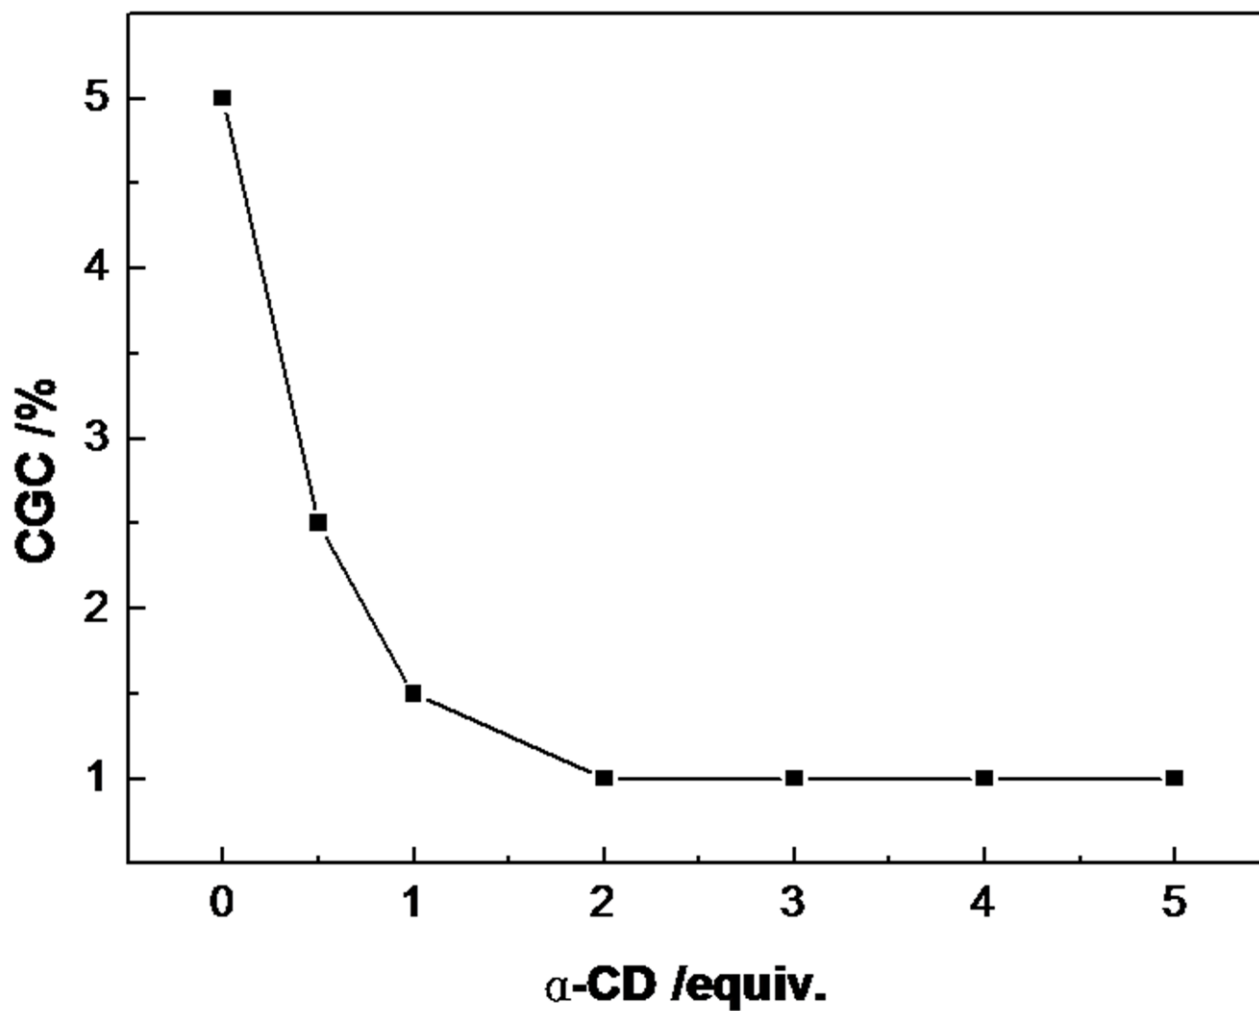

Figure S6. Influence of Gelation properties of G1 on adding  $\alpha$ -CD.

### References

1. V. Percec, M. Peterca, Y. Tsuda, B. M. Rosen, S. Uchida, M. R. Imam, G. Ungark and P. A. Heiney, *Chem. Eur. J.*, 2009, **15**, 8994.
2. X. Zhang and M. Li, *Journal of Molecular Structure*, 2008, **892**, 490.
